# Supplementary material for: Preparation of a Novel Millet Straw Biochar-Bentonite Composite and Its Adsorption Property of Hg2+ in Aqueous Solution
Source: MDPI journal article supplement (doi:10.3390/ma14051117), 2021-02-27
Supplement: s1 [file s1]

# Preparation of a Novel Millet Straw Biochar-Bentonite Composite and its Adsorption Property of Hg<sup>2+</sup> in Aqueous Solution

## Text. Optimization of preparation conditions of CB

Prepare 5 mg L<sup>-1</sup> Hg solution (calculated as Hg), add 1 g L<sup>-1</sup> of different samples, shake for 30 min, centrifuge, take 50–100 µL supernatant, measure Hg content with DMA-80 and calculate Hg adsorption value of CB. The experimental data were statistically analyzed by Excel 2017 and IBM SPSS22.0 (SPSS22.0, IBM, New York, NY, USA). The new complex polarization method was used to test the significant difference, and origin 8.2 (OriginLab, Northampton, UK) was used for mapping.

Particle size of straw, mass concentration of KOH solution, mixing ratio of straw biomass and bentonite, reaction temperature and carbonization temperature of straw powder and bentonite were investigated. The values of different factors and levels are listed in table S1.

There are five factors studied, and each factor has three levels, so L<sub>27</sub> (3<sup>13</sup>) orthogonal test table is selected. The design table and results of orthogonal test are listed in Table S1.

The results of orthogonal test are listed in Table S2. From Table S2, it can be seen that various factors have different influences on CB's ability to absorb Hg<sup>2+</sup>. According to the analysis method of orthogonal test, the maximum average value among different levels represents the best level of this factor. Therefore, the best conditions of five factors are as follows: the grain size of millet straw is 0.074 mm; Potassium hydroxide concentration is 3 mol·L<sup>-1</sup>; Straw: bentonite (w: w) = 2: 1; The reaction temperature (°C) is 70; The carbonization temperature (°C) is 300 °C. In this study, the maximum Hg adsorption capacity is the reference standard for good CB adsorption performance. Compared with the repeated experimental results of Ex12 (Hg adsorption value is 3457.402 mg·kg<sup>-1</sup>) and the above-mentioned optimal conditions (Hg adsorption value is 3970.561 mg·kg<sup>-1</sup>), it is concluded that the best condition A<sub>1</sub>B<sub>2</sub>C<sub>3</sub>D<sub>3</sub>E<sub>2</sub> can produce CB with larger adsorption capacity of Hg<sup>2+</sup>. Then, according to the experimental conditions of A<sub>1</sub>B<sub>2</sub>C<sub>3</sub>D<sub>3</sub>E<sub>2</sub>, further single factor experiments were carried out.

According to the maximum adsorption value of Hg in different single factor experiments, the absorption capacity can be judged. Figure S1 shows that the best condition of single factor experiment is A<sub>2</sub>B<sub>2</sub>C<sub>3</sub>D<sub>2</sub>E<sub>3</sub>. However, compared with the repeated experimental results of A<sub>1</sub>B<sub>2</sub>C<sub>3</sub>D<sub>3</sub>E<sub>2</sub> (Hg adsorption value is 3435.822 mg·kg<sup>-1</sup>) and the optimal conditions of the single factor experiment (Hg adsorption value is 3016.557 mg kg<sup>-1</sup>), it is confirmed that the experimental conditions of A<sub>1</sub>B<sub>2</sub>C<sub>3</sub>D<sub>3</sub>E<sub>2</sub> will produce composite materials with larger Hg<sup>2+</sup> adsorption capacity. Therefore, the optimum technological conditions are as follows: straw powder size (0.074 mm), potassium hydroxide concentration (3mol·L<sup>-1</sup>), straw: bentonite = 2:1 (w/w), reaction temperature (70 °C) and carbonization temperature (300 °C).

**Table S1.** Different level values of preparation conditions.

| Level | Straw Particle Size (mm) | KOH Concentration (mol·L <sup>-1</sup> ) | Straw/Bentonite (w/w) | Reaction Temperature (°C) | Carbonization Temperature (°C) |
|-------|--------------------------|------------------------------------------|-----------------------|---------------------------|--------------------------------|
| 1     | 0.074                    | 1                                        | 1:2                   | 30                        | 200                            |
| 2     | 0.45                     | 3                                        | 1:1                   | 50                        | 300                            |
| 3     | 1                        | 5                                        | 2:1                   | 70                        | 400                            |

**Table S2.** Results of orthogonal test.

| Treatment | A     | B | C   | D  | E   | F       |
|-----------|-------|---|-----|----|-----|---------|
| Ex1       | 0.074 | 1 | 1:2 | 30 | 200 | 275.65  |
| Ex2       | 0.074 | 1 | 1:2 | 30 | 300 | 2062.87 |
| Ex3       | 0.074 | 1 | 1:2 | 30 | 400 | 487.87  |

|       |          |          |          |          |          |         |
|-------|----------|----------|----------|----------|----------|---------|
| Ex4   | 0.074    | 3        | 1:1      | 50       | 200      | 3146.48 |
| Ex5   | 0.074    | 3        | 1:1      | 50       | 300      | 3423.32 |
| Ex6   | 0.074    | 3        | 1:1      | 50       | 400      | 3300.82 |
| Ex7   | 0.074    | 5        | 2:1      | 70       | 200      | 3240.85 |
| Ex8   | 0.074    | 5        | 2:1      | 70       | 300      | 2415.14 |
| Ex9   | 0.074    | 5        | 2:1      | 70       | 400      | 3138.54 |
| Ex10  | 0.45     | 1        | 1:1      | 70       | 200      | 1290.26 |
| Ex11  | 0.45     | 1        | 1:1      | 70       | 300      | 2564.46 |
| Ex12  | 0.45     | 1        | 1:1      | 70       | 400      | 3851.34 |
| Ex13  | 0.45     | 3        | 2:1      | 30       | 200      | 2655.37 |
| Ex14  | 0.45     | 3        | 2:1      | 30       | 300      | 2914.68 |
| Ex15  | 0.45     | 3        | 2:1      | 30       | 400      | 1273.04 |
| Ex16  | 0.45     | 5        | 1:2      | 30       | 200      | 809.39  |
| Ex17  | 0.45     | 5        | 1:2      | 50       | 300      | 935.54  |
| Ex18  | 0.45     | 5        | 1:2      | 50       | 400      | 460.35  |
| Ex19  | 1        | 1        | 2:1      | 50       | 200      | 2238.30 |
| Ex20  | 1        | 1        | 2:1      | 50       | 300      | 2276.10 |
| Ex21  | 1        | 1        | 2:1      | 50       | 400      | 2148.10 |
| Ex22  | 1        | 3        | 1:2      | 70       | 200      | 2752.35 |
| Ex23  | 1        | 3        | 1:2      | 70       | 300      | 2399.04 |
| Ex24  | 1        | 3        | 1:2      | 70       | 400      | 1141.99 |
| Ex25  | 1        | 5        | 1:1      | 30       | 200      | 2344.39 |
| Ex26  | 1        | 5        | 1:1      | 30       | 300      | 477.69  |
| Ex27  | 1        | 5        | 1:1      | 30       | 400      | 1147.23 |
| <hr/> |          |          |          |          |          |         |
| K1    | 2387.949 | 1910.550 | 2393.999 | 1515.421 | 2083.671 | -       |
| K2    | 1861.603 | 2556.343 | 1258.339 | 2082.044 | 2163.204 | -       |
| K3    | 1880.577 | 1663.236 | 2477.791 | 2532.663 | 1883.253 | -       |
| Range | 526.346  | 893.108  | 1219.452 | 1017.242 | 279.951  | -       |

Note: F: Hg adsorption value ( $\text{mg}\cdot\text{kg}^{-1}$ ). K: Average value of Hg adsorption value.

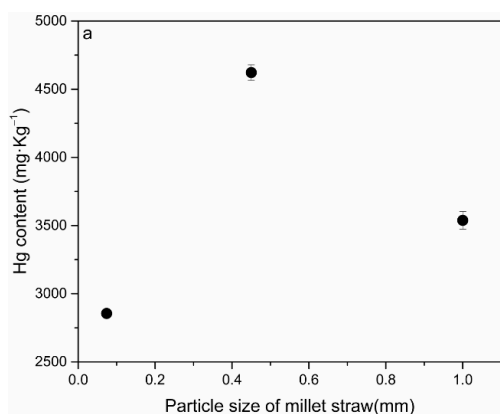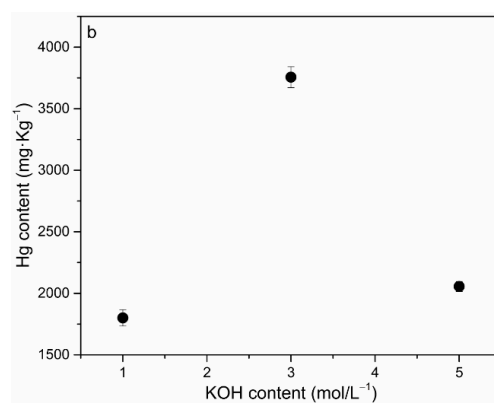

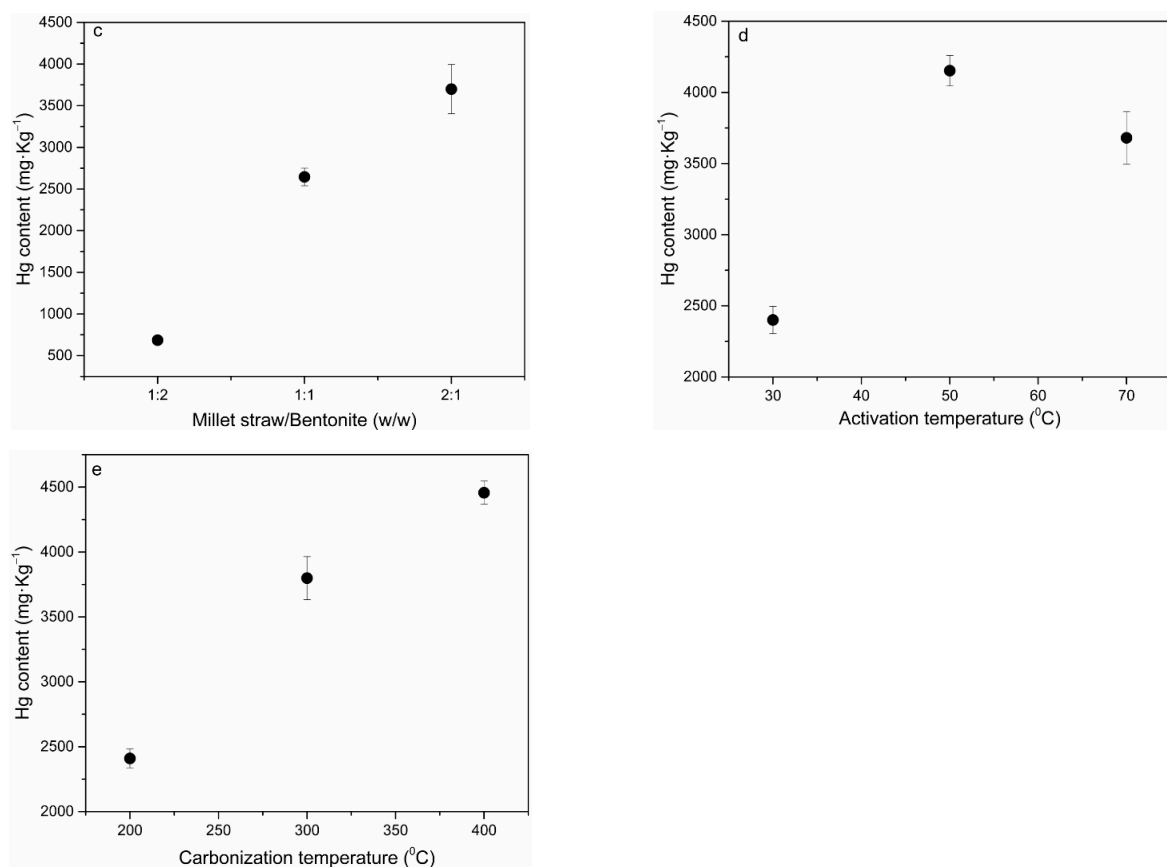

**Figure S1.** The Single-factor Hg adsorption experiments with 5 factors and 3 levels studied. (a) Single-factor experiments of particle of millet straw, (b) Single-factor experiments of KOH content, (c) Single-factor experiments of millet straw/bentonite, (d) Single-factor experiments of activation temperature, (e) Single-factor experiments of carbonization temperature.
